# Supplementary material for: Single- and Double-Sided Coated Gas Diffusion Layers Used in Polymer Electrolyte Fuel Cells: A Numerical Study
Source: MDPI journal article supplement (doi:10.3390/en16114363), 2023-05-27
Supplement: s1 [file s1]

# Supplementary Materials for

## Single and Double-sided Coated Gas Diffusion Layers used in Polymer Electrolyte Fuel Cells: A Numerical Study

I. C. Okereke <sup>1,2</sup>, M.S. Ismail <sup>3</sup>, D.B. Ingham <sup>1</sup>, K.J. Hughes <sup>1,\*</sup>, L. Ma <sup>1</sup>, M. Pourkashanian <sup>1,4</sup>

<sup>1</sup> Energy Institute, The University of Sheffield, Sheffield, UK.

<sup>2</sup> Department of Mechanical Engineering, Faculty of Engineering, Akwa Ibom State University, Nigeria.

<sup>3</sup> School of Engineering, University of Hull, Hull HU6 7RX, UK

<sup>4</sup> Translational Energy Research Centre, The University of Sheffield, Sheffield, UK.

Corresponding author: k.j.hughes@sheffield.ac.uk (K.J. Hughes)

### Source terms used in the transport equations:

#### 1. Mass transport:

$S_{\text{mass}} = 0$ . Where  $S_{\text{mass}}$  is the mass source term

#### 2. Momentum transport:

$$S_{\text{mom}} = \frac{\mu \vec{u}}{K}$$

where  $S_{\text{mom}}$  is the momentum source,  $\mu$  is the dynamic viscosity,  $\vec{u}$  is the velocity vector, and  $K$  is the permeability.

#### 3. Species transport:

$S_k$  is the source term that represents either consumption/production of species  $k$  ( $\text{H}_2$ ,  $\text{O}_2$  or  $\text{H}_2\text{O}$ ) and is given as follows [26, 27]:

$$S_{\text{H}_2} = -\frac{i_a a_a}{2F} M_{\text{H}_2}$$

$$S_{\text{O}_2} = -\frac{i_c a_c}{4F} M_{\text{O}_2}$$

$$S_{\text{H}_2\text{O}} = \frac{i_c a_c}{2F} M_{\text{H}_2\text{O}}$$

where  $i_a$  and  $i_c$  are the anodic and cathodic local current density respectively,  $a_a$  and  $a_c$  are the anodic and cathodic specific surface areas respectively,  $F$  is the Faraday's constant (96485 C/mol), and  $M_{\text{H}_2}$ ,  $M_{\text{O}_2}$  and  $M_{\text{H}_2\text{O}}$  are the molecular weights for hydrogen, oxygen and water respectively.

#### 4. Energy transport:

$S_e$  is the heat source term and takes one of the following forms in each fuel cell component [25]:

$$S_e = \begin{cases} i_s^2/\sigma_s \text{ for anode and cathode GDLs} \\ R_a \left[ \eta_a - \frac{T\Delta S_a}{2F} \right] + \frac{i_s^2}{\sigma_s} + \frac{i_m^2}{\sigma_m} \text{ for anode catalyst layer} \\ R_c \left[ -\eta_c - \frac{T\Delta S_c}{2F} \right] + \frac{i_s^2}{\sigma_s} + \frac{i_m^2}{\sigma_m} \text{ for cathode catalyst layer} \end{cases}$$

where  $R_a$  and  $R_c$  are the anode and cathode exchange current densities,  $i_s$  and  $i_m$  are the solid phase and membrane phase current densities,  $\sigma_s$  and  $\sigma_m$  are the electrical and ionic conductivities of the solid and membrane phases respectively, and  $\eta_a$  and  $\eta_c$  are the anodic and cathodic overpotential,  $\Delta S_a$  and  $\Delta S_c$  are the reaction entropies at anode and cathode catalyst layers respectively.

### 5. Charge transport:

$S_{\phi,s}$  and  $S_{\phi,m}$  are the solid-phase potential and membrane-phase potential respectively and are given as follows [31]:

$$S_{\phi,s} = \begin{cases} j_a \text{ at the anode CL} \\ -j_c \text{ at the cathode CL} \end{cases}$$

$$S_{\phi,m} = \begin{cases} -j_a \text{ at the anode CL} \\ j_c \text{ at the cathode CL} \end{cases}$$

where  $j_a$  and  $j_c$  are the volumetric exchange current density ( $A/m^3$ ) at the anode and cathode catalyst layers respectively and are obtained using Butler-Volmer equations [32]:

$$j_a = i_a^{\text{ref}} a_a \left( \frac{c_{H_2}}{c_{H_2}^{\text{ref}}} \right)^{0.5} \left[ \exp \left( \frac{\alpha_{a,a} F}{RT} \eta_{\text{act},a} \right) - \exp \left( \frac{\alpha_{a,c} F}{RT} \eta_{\text{act},a} \right) \right]$$

$$j_c = i_c^{\text{ref}} a_c \left( \frac{c_{O_2}}{c_{O_2}^{\text{ref}}} \right) \left[ \exp \left( \frac{\alpha_{c,a} F}{RT} \eta_{\text{act},c} \right) - \exp \left( \frac{\alpha_{c,c} F}{RT} \eta_{\text{act},c} \right) \right]$$

where  $i_a^{\text{ref}}$  and  $i_c^{\text{ref}}$  are the reference anodic and cathodic exchange current density respectively,  $\alpha_{a,a}$  and  $\alpha_{a,c}$  are respectively the anode and cathode transfer coefficients for the electrochemical reactions in the anode catalyst layer,  $\alpha_{c,a}$  and  $\alpha_{c,c}$  are respectively the anode and cathode transfer coefficients in the cathode catalyst layer,  $c_{H_2}^{\text{ref}}$  and  $c_{O_2}^{\text{ref}}$  are the reference hydrogen and oxygen concentrations respectively,  $F$  is the Faraday's constant and  $R$  is the universal gas constant.  $\eta_{\text{act},a}$  and  $\eta_{\text{act},c}$  are the anodic and cathodic overpotential and are given as follows:

$$\eta_{\text{act},a} = \phi_s - \phi_m$$

$$\eta_{\text{act},c} = \phi_s - \phi_m - E_0$$

where  $E_0$  is the reference potential of the electrodes and is equal to zero for the anode, while for the cathode it is equal to the equilibrium cell potential ( $E_r$ ) [33,34]:

$$E_r = 1.482 - 0.000845T + 0.0000431T \ln (P_{H_2} P_{O_2}^{0.5})$$

The membrane ionic conductivity,  $\sigma_m$ , is estimated using an empirical correlation developed by [35]:

$$\phi_m = (0.005139\lambda - 0.00326) \exp \left[ 1268 \left( \frac{1}{303} - \frac{1}{T} \right) \right]$$

where  $\lambda$  is the membrane water content which is empirically correlated by [32]:

$$\lambda = \begin{cases} 1.409 + 11.26ac - 18.77ac^2 + 16.21ac^3, & 0 < ac \leq 1 \\ 10.11 + 2.944(ac - 1), & 1 < ac \leq 3 \\ 16.8, & ac > 3 \end{cases}$$

where  $ac$  is the water activity and is given as [27]:

$$ac = \frac{P_v}{P_s}$$

where  $P_v$  is the partial pressure of water vapour and  $P_s$  is the pressure of saturated water vapor which is given by [27]:

$$\log(P_s) = -2.1794 + 0.02953(T - 273.15) - 9.1837 \times 10^{-5}(T - 273.15)^2 + 1.4454 \times 10^{-7}(T - 273.15)^3$$

## 6. Liquid water transport:

$S_l$  is the source for the liquid phase, and is specified as follows [25]:

$$S_l = S_{\text{phase}} - S_\lambda M_{\text{H}_2\text{O}} + \frac{i_c}{2F} M_{\text{H}_2\text{O}} \text{ at the cathode catalyst layer.}$$

$S_l = S_{\text{phase}}$  at the anode catalyst layer, anode gas diffusion layer, and the cathode gas diffusion layer given as follows:

$$S_{\text{phase}} = \begin{cases} K_{\text{cond}} \frac{\varepsilon(1-s)x_v}{RT} M_{\text{H}_2\text{O}} (P_v - P_s) & P_v \geq P_s \\ K_{\text{evap}} \varepsilon \rho_l (P_v - P_s) & P_v < P_s \end{cases}$$

where  $K_{\text{cond}}$  is the rate of condensation,  $K_{\text{evap}}$  is the rate of evaporation,  $\rho_l$  is the density of liquid water, and  $x_v$  is the mole fraction of water vapour.

$$S_\lambda = \gamma_a \frac{\rho_m}{M_m} (\lambda^{\text{eq}} - \lambda) \text{ at the anode catalyst layer}$$

$$S_\lambda = \gamma_c \frac{\rho_m}{M_m} (\lambda^{\text{eq}} - \lambda) + \frac{i_c}{2F} \text{ at the cathode catalyst layer}$$

where  $\rho_m$  is the density of the dry membrane and  $M_m$  is the membrane equivalent weight.
