# Supplementary material for: Single- and Double-Sided Coated Gas Diffusion Layers Used in Polymer Electrolyte Fuel Cells: A Numerical Study
Source: MDPI journal article supplement (doi:10.3390/en16114363), 2023-05-27
Supplement: s1 [file s1]

Archive with 1 entries (1 files):
- energies-2399768-supplementary.pdf
